# Supplementary material for: Early Transcriptional Signatures of the Immune Response to a Live Attenuated Tetravalent Dengue Vaccine Candidate in Non-human Primates
Source: PLoS Negl Trop Dis. 2016 May 23;10(5):e0004731. doi: 10.1371/journal.pntd.0004731 (PMC4877054; doi:10.1371/journal.pntd.0004731)
Supplement: S1 Table — (XLSX) [file pntd.0004731.s002.xlsx]

## Sheet: Sheet1
S1 Table
Genes differentially expressed (DE) after TDV vaccination in 30 animals compared to baseline.
Genes DE in vaccinated animals (n=30) compared to placebo animals (n=5) shaded in grey.
				Day significant				Fold-change compared to baseline (or placebo, rows 295-340)
HEEBO probe ID	Gene Symbol	Gene Name	Entrez Gene ID	1	3	5	7	Day 1	Day 3	Day 5	Day 7	Max fold-change
hSQ024313	IFI44	interferon-induced protein 44	10561	1	3	5	7	1.89264	1.54314	2.42048	1.97074	2.42048
hSQ031570	S100A8	s100 calcium binding protein a8	6279	1	3	5		1.66863	2.18707	1.73227	1.1222	2.18707
hSQ036350	DDX58	dead (asp-glu-ala-asp) box polypeptide 58	23586	1	3	5	7	1.64257	1.5125	2.02184	1.70488	2.02184
hSQ044881	MX1	myxovirus (influenza virus) resistance 1, interferon-inducible protein p78 (mouse)	4599	1	3	5	7	1.9223	1.51458	1.96473	1.75443	1.96473
hSQ037368	OASL	2'-5'-oligoadenylate synthetase-like	8638	1	3	5	7	1.88542	1.56063	1.9416	1.73217	1.9416
hSQ039604	IFIT1	interferon-induced protein with tetratricopeptide repeats 1	3434	1	3	5	7	1.67772	1.33213	1.88249	1.64623	1.88249
hSQ043572	OAS2	2'-5'-oligoadenylate synthetase 2, 69/71kda	4939	1	3	5	7	1.55563	1.32866	1.84176	1.71114	1.84176
hSQ018030	S1PR2	sphingosine-1-phosphate receptor 2	9294		3			1.13767	1.83873	1.10323	1.4866	1.83873
hSQ044941	LAMA3	laminin, alpha 3	3909		3			1.31348	1.78414	1.31828	1.70279	1.78414
hSQ031895	XAF1	xiap associated factor 1	54739	1	3	5	7	1.59826	1.4471	1.78036	1.58136	1.78036
hSQ027534	PAQR9	progestin and adipoq receptor family member ix	344838				7	1.38447	1.64148	1.29205	1.7758	1.7758
hSQ028072	CD163	cd163 molecule	9332			5		1.51382	1.34703	1.7739	1.33516	1.7739
hSQ045409	TNFAIP6	tumor necrosis factor, alpha-induced protein 6	7130		3			1.14716	1.76095	1.42799	0.996955	1.76095
hSQ012818	GP9	glycoprotein ix (platelet)	2815		3			1.74493	1.73769	1.44124	1.2062	1.74493
hSQ025136	VCAN	versican	1462		3	5		1.27265	1.73315	1.31692	1.09913	1.73315
hSQ031351	PF4V1	platelet factor 4 variant 1	5197		3			1.18093	1.69281	1.34549		1.69281
hSQ020767	TNFSF13B	tumor necrosis factor (ligand) superfamily, member 13b	10673	1	3	5		1.54196	1.66392	1.69169	1.44741	1.69169
hSQ026684	FAM46C	family with sequence similarity 46, member c	54855	1	3		7	1.02785	1.1343	0.808881	1.69093	1.69093
hSQ029289	DHX58	dexh (asp-glu-x-his) box polypeptide 58	79132	1		5		1.58041	1.31232	1.68855	1.40209	1.68855
hSQ015912	KCNH5	potassium voltage-gated channel, subfamily h (eag-related), member 5	27133		3			1.29519	1.68432	1.28298	1.60677	1.68432
hSQ020119	WDFY3	wd repeat and fyve domain containing 3	23001		3			1.32807	1.66498	1.40521	1.34692	1.66498
hSQ011519	IFI6	interferon, alpha-inducible protein 6	2537	1	3	5		1.57881	1.48315	1.66459	1.51065	1.66459
hSQ028106	BACE2	beta-site app-cleaving enzyme 2	25825				7	1.12298	1.20585	0.852241	1.66317	1.66317
hSQ017374	AKAP13	a kinase (prka) anchor protein 13	11214	1				1.65787	1.1799	1.29834	1.16763	1.65787
hSQ022580	PARP14	poly (adp-ribose) polymerase family, member 14	54625	1	3	5	7	1.59804	1.35251	1.64834	1.40173	1.64834
hSQ025583	SPTA1	spectrin, alpha, erythrocytic 1 (elliptocytosis 2)	6708				7	0.857871	0.831437	0.896577	1.64737	1.64737
hSQ008910	CSTA	cystatin a (stefin a)	1475	1	3	5		1.60529	1.64463	1.59494	1.1603	1.64463
hSQ044299	ITGA2B	integrin, alpha 2b (platelet glycoprotein iib of iib/iiia complex, antigen cd41)	3674	1	3	5		1.63959	1.43628	1.46713	1.26898	1.63959
hSQ006785	TET2	tet oncogene family member 2	54790	1	3	5		1.55252	1.63637	1.54221	1.23656	1.63637
hSQ024082	GALIG	galectin-3 internal gene	81625		3			1.23842	1.63146	1.23956	1.06794	1.63146
hSQ006723	ISG15	isg15 ubiquitin-like modifier	9636	1		5	7	1.62382	1.22802	1.6289	1.5013	1.6289
hSQ016773	TRIM58	tripartite motif containing 58::tripartite motif-containing 58	25893				7	1.02468	0.997346	0.823686	1.62845	1.62845
hSQ007509	S100A9	s100 calcium binding protein a9	6280		3			1.32409	1.62713	1.32225	1.11347	1.62713
hSQ004691	RMND5B	required for meiotic nuclear division 5 homolog b (s. cerevisiae)::nhp2 ribonucleoprotein homolog (yeast)	64777		3		7	1.25736	1.45045	1.06337	1.62422	1.62422
hSQ008471	BCL2L11	bcl2-like 11 (apoptosis facilitator)	10018		3			1.34155	1.48627	1.00452	1.62023	1.62023
hSQ019103	PF4	platelet factor 4	5196		3			1.60202	1.53192	1.57782	1.18091	1.60202
hSQ020560	VWF	von willebrand factor	7450	1				1.60111	1.27696	1.28134	1.12543	1.60111
hSQ018380	IFI27	interferon, alpha-inducible protein 27	3429	1	3	5	7	1.46578	1.32439	1.59512	1.45062	1.59512
hSQ039682	UBL7	ubiquitin-like 7 (bone marrow stromal cell-derived)	84993		3			1.07733	1.59254	1.15483	1.43343	1.59254
hSQ014304	LILRA3	leukocyte immunoglobulin-like receptor, subfamily a (without tm domain), member 3	11026		3			1.27678	1.58864	1.33273	1.31612	1.58864
hSQ003122	IFIT5	interferon-induced protein with tetratricopeptide repeats 5	24138	1		5	7	1.37588	1.21604	1.58055	1.35164	1.58055
hSQ005724	MYEOV	myeloma overexpressed (in a subset of t(11;14) positive multiple myelomas)	26579	1	3			1.5799	1.52362	1.38026	1.3157	1.5799
hSQ021229	LST1	leukocyte specific transcript 1	7940		3			1.39972	1.57875	1.19436	1.28719	1.57875
hSQ011994	GCA	grancalcin, ef-hand calcium binding protein	25801		3			1.00042	1.57769	1.13031	0.7854	1.57769
hSQ005607	CMPK2	cytidine monophosphate (ump-cmp) kinase 2, mitochondrial	129607			5	7	1.33916	1.12938	1.57489	1.39691	1.57489
hSQ022552	TREML1	triggering receptor expressed on myeloid cells-like 1	340205	1	3	5		1.47276	1.57481	1.44945	1.33944	1.57481
hSQ020337	DYSF	dysferlin, limb girdle muscular dystrophy 2b (autosomal recessive)	8291		3			1.32283	1.57417	1.31566	1.02408	1.57417
hSQ041506	RPS20P14	ribosomal protein s20 pseudogene 14::transcribed locus, strongly similar to np_998369.1 40s ribosomal protein s20 [danio rerio]	440992		3			1.30843	1.41765	1.57338	1.03754	1.57338
hSQ015730	KCNJ15	potassium inwardly-rectifying channel, subfamily j, member 15	3772		3			1.14256	1.57043	1.27442	1.1014	1.57043
hSQ035434	LOC388588	hypothetical protein loc388588	388588	1	3	5		1.45572	1.5606	1.45199	1.2049	1.5606
hSQ028191	TMEM205	rab3d, member ras oncogene family::transmembrane protein 205	374882		3			1.14847	1.55819	1.12973	1.0316	1.55819
hSQ007558	2014-09-05	glycoprotein ib (platelet), beta polypeptide::septin 5	5413		3			1.25571	1.55563		1.01924	1.55563
hSQ007000	OAS1	2',5'-oligoadenylate synthetase 1, 40/46kda::2'-5'-oligoadenylate synthetase 1, 40/46kda	4938		3			1.31616	1.40965	1.12688	1.55007	1.55007
hSQ001307	HOPX	hop homeobox	84525		3			1.18474	1.54721	1.21063	0.986898	1.54721
hSQ006986	UBE2O	ubiquitin-conjugating enzyme e2o	63893				7	1.08098	0.881073	1.04338	1.54221	1.54221
hSQ002162	RBX1	ring-box 1, e3 ubiquitin protein ligase	9978		3			1.25681	1.54054	1.22336	1.30652	1.54054
hSQ031382	RNF213	ring finger protein 213	57674	1		5	7	1.54007	1.20734	1.53035	1.39452	1.54007
hSQ031816	DCAF12	ddb1 and cul4 associated factor 12	25853				7	1.07252	1.16851	0.972206	1.53972	1.53972
hSQ026446	LILRA1	leukocyte immunoglobulin-like receptor, subfamily a (with tm domain), member 1	11024	1		5		1.46145	1.39015	1.53858	1.45318	1.53858
hSQ026031	LOC389185	hypothetical loc389185	389185	1	3			1.53763	1.33296	1.28165	0.790964	1.53763
hSQ022415	MME	membrane metallo-endopeptidase	4311		3			1.02222	1.53744	1.19127	1.0488	1.53744
hSQ023716	C5ORF32	chromosome 5 open reading frame 32	84418		3			1.08711	1.53634	1.07639	0.91817	1.53634
hSQ022593	CLEC4A	c-type lectin domain family 4, member a	50856		3			1.14873	1.53388	1.36282	1.0558	1.53388
hSQ004459	MGRN1	mahogunin, ring finger 1	23295		3			1.1402	1.51075	1.04531	1.52997	1.52997
hSQ020453	LOC144383	transcribed locus::interferon induced transmembrane protein pseudogene	144383		3			1.25651	1.52981	1.1972	0.961742	1.52981
hSQ012370	MUC19	mucin 19, oligomeric	283463		3			1.29192	1.52644	1.31425	1.01833	1.52644
hSQ023782	BMX	bmx non-receptor tyrosine kinase	660		3			0.992183	1.52507	1.12042	0.898908	1.52507
hSQ015002	PYCARD	pyd and card domain containing	29108	1	3	5		1.31391	1.52348	1.30356	1.11193	1.52348
hSQ011866	PYGL	phosphorylase, glycogen, liver	5836		3			1.0475	1.51922	1.10138	0.917569	1.51922
hSQ040451	NFE2	nuclear factor (erythroid-derived 2), 45kda	4778		3			1.13727	1.51638	1.08614	1.07342	1.51638
hSQ005110	EIF2AK2	eukaryotic translation initiation factor 2-alpha kinase 2	5610			5		1.242	1.14499	1.51502	1.27015	1.51502
hSQ024049	FCN1	ficolin (collagen/fibrinogen domain containing) 1	2219		3			1.31561	1.50799	1.36843	1.43835	1.50799
hSQ021365	MS4A6A	membrane-spanning 4-domains, subfamily a, member 6a	64231		3	5		1.0745	1.50466	1.35434	1.19006	1.50466
hSQ042254	ARL4A	adp-ribosylation factor-like 4a	10124				7	1.01139	1.09087	0.920679	1.50435	1.50435
hSQ020261	SERPINB1	serpin peptidase inhibitor, clade b (ovalbumin), member 1	1992		3			1.02479	1.50143	1.19168	1.06955	1.50143
hSQ038294	TYMP	thymidine phosphorylase	1890	1	3	5		1.50044	1.48959	1.48942	1.31891	1.50044
hSQ006869	MMP9	matrix metallopeptidase 9 (gelatinase b, 92kda gelatinase, 92kda type iv collagenase)	4318		3			1.22349	1.49658	1.2492	1.23143	1.49658
hSQ003978	PADI4	peptidyl arginine deiminase, type iv	23569		3			1.23869	1.49576	1.15478	1.08761	1.49576
hSQ014566	TLR5	toll-like receptor 5	7100		3			1.13931	1.48951	1.17744	1.07974	1.48951
hSQ012185	STAT1	signal transducer and activator of transcription 1, 91kda	6772	1		5		1.48088	1.30249	1.48504	1.38271	1.48504
hSQ039194	IFI27L2	interferon, alpha-inducible protein 27-like 2	83982		3	5		1.24143	1.48349	1.33886	1.06683	1.48349
hSQ032051	COX7B	cytochrome c oxidase subunit viib	1349		3	5		1.23224	1.44705	1.48182	1.00529	1.48182
hSQ022274	GBP1	guanylate binding protein 1, interferon-inducible	2633			5		1.28673	1.26539	1.48056	1.39494	1.48056
hSQ027695	C1ORF162	chromosome 1 open reading frame 162	128346		3			1.21069	1.48029	1.31065	1.15045	1.48029
hSQ004148	QPCT	glutaminyl-peptide cyclotransferase	25797		3			0.9619	1.47922	1.19679	1.06287	1.47922
hSQ012320	RASSF7	ras association (ralgds/af-6) domain family (n-terminal) member 7	8045		3			1.23147	1.36239	1.00578	1.47836	1.47836
hSQ034605	MXI1	max interactor 1	4601				7	1.03107	1.15322	1.03234	1.47495	1.47495
hSQ006409	MAFB	v-maf musculoaponeurotic fibrosarcoma oncogene homolog b (avian)	9935	1		5		1.47201	1.11694	1.41781	1.12218	1.47201
hSQ012335	RNF24	ring finger protein 24	11237		3			1.22258	1.46764	1.17718	0.937322	1.46764
hSQ017997	TG	thyroglobulin	7038		3			1.28644	1.46718	1.217	1.12525	1.46718
hSQ013958	LOC402247	similar to calgizzarin (s100c protein) (mln 70)	402247		3			1.13695	1.46662	1.16568	1.01197	1.46662
hSQ023680	IL1R2	interleukin 1 receptor, type ii	7850		3			1.08778	1.46593	1.18521	0.930143	1.46593
hSQ016625	TALDO1	transaldolase 1	6888		3			1.36131	1.46578	1.21672	1.12039	1.46578
hSQ032488	NEAT1	nuclear paraspeckle assembly transcript 1 (non-protein coding)	283131	1				1.46572	1.20198	1.00096	0.853637	1.46572
hSQ015439	TXN	thioredoxin	7295		3			1.13472	1.46544	1.32439	1.02104	1.46544
hSQ041588	PLAC8	placenta-specific 8	51316		3	5		1.26747	1.38502	1.4637	1.28107	1.4637
hSQ038243	SORT1	sortilin 1	6272		3			1.3449	1.46324	1.30933	1.12883	1.46324
hSQ038233	TNRC6A	trinucleotide repeat containing 6a	27327		3			1.26438	1.4629	1.14173	1.08805	1.4629
hSQ018645	IFITM2	interferon induced transmembrane protein 1 (9-27)::interferon induced transmembrane protein 2 (1-8d)	10581		3			1.20762	1.46155	1.16932	1.02954	1.46155
hSQ017088	CRISPLD2	cysteine-rich secretory protein lccl domain containing 2	83716		3		7	1.18148	1.46096	1.09827	0.750453	1.46096
hSQ041135	SERPINB10	serpin peptidase inhibitor, clade b (ovalbumin), member 10	5273		3			1.39249	1.4571	1.40194	1.21032	1.4571
hSQ015940	TWIST2	twist homolog 2 (drosophila)	117581		3			1.17106	1.45567	1.18633	0.948115	1.45567
hSQ017574	EPB49	erythrocyte membrane protein band 4.9 (dematin)	2039				7	1.03475	1.11445	0.868843	1.45481	1.45481
hSQ034336	SOD2	superoxide dismutase 2, mitochondrial	6648		3			1.19762	1.45367	1.13328	0.970298	1.45367
hSQ006851	RPL31P50	ribosomal protein l31 pseudogene 50	341356			5		1.16313	1.28518	1.4535	0.970482	1.4535
hSQ023285	LGALS13	lectin, galactoside-binding, soluble, 13	29124		3			1.12976	1.45312	1.28081	1.26304	1.45312
hSQ031479	PLSCR2	phospholipid scramblase 2	57047			5		1.06672	1.11853	1.45125	1.26023	1.45125
hSQ042304	RAB3D	rab3d, member ras oncogene family	9545		3			1.09565	1.44973	1.16454	1.05378	1.44973
hSQ013730	ALOX5AP	arachidonate 5-lipoxygenase-activating protein	241		3			1.23285	1.44922	1.28476	1.07955	1.44922
hSQ045525	BRI3	brain protein i3	25798		3			1.05682	1.44911	1.14126	1.12721	1.44911
hSQ028886	NCF4	neutrophil cytosolic factor 4, 40kda	4689		3			1.21897	1.44727	1.196	1.05025	1.44727
hSQ011649	GMFG	glia maturation factor, gamma	9535		3			1.38271	1.44704	1.40072	1.06008	1.44704
hSQ019631	IRF7	interferon regulatory factor 7	3665	1		5		1.44443	1.27825	1.43147	1.27559	1.44443
hSQ019357	UNC93B3	unc-93 homolog b3 pseudogene (c. elegans)	285296	1				1.44243	1.13695	1.30029	1.08661	1.44243
hSQ018877	CSTF2T	cleavage stimulation factor, 3' pre-rna, subunit 2, 64kda, tau variant	23283		3			1.1225	1.43959	1.14239	1.21286	1.43959
hSQ044168	LOC402208	similar to transcription initiation factor tfiid subunit 11 (transcription initiation factor tfiid 28 kda subunit) (taf(ii)28) (tafii-28) (tafii28) (tfiid subunit p30-beta)::taf11 rna polymerase ii, tata box binding protein (tbp)-associated factor, 28kda pseudogene::putative taf11-like protein ensp00000332601-like::similar to hcg1809904	402208		3			1.23506	1.4382	1.18957	1.41773	1.4382
hSQ043861	LOC346521	similar to histidine triad nucleotide-binding protein 1 (adenosine 5-monophosphoramidase) (protein kinase c inhibitor 1) (protein kinase c-interacting protein 1) (pkci-1)	346521		3			1.18989	1.43777	1.40477	1.17786	1.43777
hSQ010301	CXCL10	chemokine (c-x-c motif) ligand 10	3627			5		1.13253	1.24771	1.4377	1.43365	1.4377
hSQ007480	GNG11	guanine nucleotide binding protein (g protein), gamma 11	2791		3	5		1.15495	1.38847	1.43512	1.04066	1.43512
hSQ031683	GPCPD1	glycerophosphocholine phosphodiesterase gde1 homolog (s. cerevisiae)	0		3			1.1028	1.43379	1.12026	1.06159	1.43379
hSQ017157	GPR109A	hydroxycarboxylic acid receptor 2::g protein-coupled receptor 109a	338442		3			1.0874	1.43364	1.08503	0.900386	1.43364
hSQ000441	CYP3A5	cytochrome p450, family 3, subfamily a, polypeptide 5::transcribed locus	1577		3	5		1.19419	1.43222	1.31699	1.08611	1.43222
hSQ019503	LOC392145	similar to mtr3 (mrna transport regulator 3)-homolog; mtr3 (mrna transport regulator 3)-homolog (yeast)::exosome component 6 pseudogene	392145		3			1.01954	1.43125	0.961076		1.43125
hSQ033683	CASP1	caspase 1, apoptosis-related cysteine peptidase (interleukin 1, beta, convertase)	834			5		1.23442	1.22654	1.43061	1.16725	1.43061
hSQ023877	CYP4F2	cytochrome p450, family 4, subfamily f, polypeptide 2	8529		3			1.282	1.42619	1.34595	1.04464	1.42619
hSQ019835	HAS1	hyaluronan synthase 1	3036		3			1.21361	1.42615	1.11716	0.955489	1.42615
hSQ027816	CTTN	cortactin	2017	1	3	5		1.42487	1.35175	1.34552	1.16864	1.42487
hSQ001763	CKLF	chemokine-like factor	51192		3			1.13899	1.42484	1.21736	1.00942	1.42484
hSQ011316	KEL	kell blood group, metallo-endopeptidase	3792				7	1.25897	1.17503	0.975562	1.42481	1.42481
hSQ021259	DGAT2	diacylglycerol o-acyltransferase 2::diacylglycerol o-acyltransferase homolog 2 (mouse)	84649		3			1.18561	1.42358	1.16727	0.97297	1.42358
hSQ039272	S100A6	s100 calcium binding protein a6	6277	1	3			1.3211	1.42331	1.20124	1.06404	1.42331
hSQ012075	COX7A2P2	cytochrome c oxidase subunit viia polypeptide 2 (liver) pseudogene 2	1348		3			1.08833	1.4206	1.22354	1.07007	1.4206
hSQ036182	LOC440926	h3 histone, family 3a pseudogene	440926		3			1.1523	1.41816	1.11707	0.911996	1.41816
hSQ017293	AIF1	allograft inflammatory factor 1	199		3	5		1.39525	1.35643	1.41736	1.24219	1.41736
hSQ035947	C18ORF49	chromosome 18 open reading frame 49	400653			5	7	1.30931	1.22247	1.41648	1.36487	1.41648
hSQ043644	LSR	lipolysis stimulated lipoprotein receptor	51599		3			1.189	1.41645	1.13781	1.29508	1.41645
hSQ010968	HIST2H4A	histone cluster 2, h2be::histone cluster 2, h4a	8370		3			1.19361	1.41578	1.17446	0.986917	1.41578
hSQ029885	ANKRD58	ankyrin repeat domain 58	347454		3			1.28404	1.41369	1.21822	1.33697	1.41369
hSQ020731	TSPAN9	tetraspanin 9	10867	1				1.41124	1.25818	1.22264	1.01767	1.41124
hSQ043075	NFIA	nuclear factor i/a	4774				7	1.06992	1.15309	0.979986	1.41079	1.41079
hSQ019786	RGS19	regulator of g-protein signaling 19	10287		3			1.28972	1.40878	1.27315	1.09376	1.40878
hSQ027646	C7ORF41	chromosome 7 open reading frame 41	222166		3			1.19375	1.40851	1.28654	1.04582	1.40851
hSQ040637	GBP2	guanylate binding protein 2, interferon-inducible	2634			5		1.29673	1.22143	1.40848	1.2854	1.40848
hSQ019223	GK	glycerol kinase	2710		3			1.03588	1.40581	1.24476	0.818516	1.40581
hSQ018639	STEAP4	steap family member 4	79689		3			1.01916	1.40394	1.26037	1.0058	1.40394
hSQ015396	CLEC4G	c-type lectin domain family 4, member g	339390		3			1.37114	1.40307	1.31586	1.17757	1.40307
hSQ018144	TP53I11	tumor protein p53 inducible protein 11	9537		3			1.04177	1.4012	1.13393	0.973554	1.4012
hSQ029144	LGALS3	lectin, galactoside-binding, soluble, 3	3958		3			1.10665	1.40035	1.0708	0.885863	1.40035
hSQ026753	BCL2A1	bcl2-related protein a1	597		3			1.07284	1.39551	1.40024	0.858665	1.40024
hSQ002941	COL9A2	collagen, type ix, alpha 2	1298		3			1.3449	1.40007	1.2367	1.12803	1.40007
hSQ030764	CCNJL	cyclin j-like	79616		3			1.113	1.39967	1.0933	0.795592	1.39967
hSQ029170	TMEM86A	transmembrane protein 86a	144110			5		1.30149	1.26898	1.39851	1.16267	1.39851
hSQ010817	RPL27AP6	ribosomal protein l27a pseudogene 6::transcribed locus, strongly similar to np_000981.1 60s ribosomal protein l27a [homo sapiens]	389435		3	5		1.14728	1.31077	1.39773	0.931615	1.39773
hSQ042305	KCNQ1	potassium voltage-gated channel, kqt-like subfamily, member 1	3784	1		5		1.38252	1.39403	1.3685	1.1779	1.39403
hSQ031057	IL1RN	interleukin 1 receptor antagonist	3557		3			1.16485	1.38972	1.24606	1.07881	1.38972
hSQ017442	B3GNT8	udp-glcnac:betagal beta-1,3-n-acetylglucosaminyltransferase 8	374907		3			1.30888	1.38692	1.26705	1.12252	1.38692
hSQ008186	RAB31	rab31, member ras oncogene family	11031		3			1.1822	1.38667	1.2594	1.03083	1.38667
hSQ000568	NEXN	nexilin (f actin binding protein)	91624	1		5		1.38415	1.27279	1.35598	1.01373	1.38415
hSQ008419	CTDNEP1	gaba(a) receptor-associated protein::ctd nuclear envelope phosphatase 1	23399		3			1.24214	1.38415	1.15589	1.3039	1.38415
hSQ016976	CPSF1	cleavage and polyadenylation specific factor 1, 160kda	29894		3			1.16406	1.38319	1.08837	1.27928	1.38319
hSQ025820	PGD	phosphogluconate dehydrogenase	5226		3			1.17799	1.38175	1.13984	0.951648	1.38175
hSQ016480	LOC126537	similar to cytochrome p-450	126537		3			1.12793	1.38136	1.16157	0.956801	1.38136
hSQ024449	RDH12	retinol dehydrogenase 12 (all-trans/9-cis/11-cis)	145226		3			1.21093	1.38115	1.26507	1.05454	1.38115
hSQ015386	IFITM4P	interferon induced transmembrane protein 4 pseudogene	340198		3			1.12254	1.37885	1.24413	1.06098	1.37885
hSQ003169	HGD	homogentisate 1,2-dioxygenase	3081		3			1.19044	1.37885	1.21226	0.980892	1.37885
hSQ019648	CAMK1G	calcium/calmodulin-dependent protein kinase ig	57172		3			1.00293	1.37858	1.17779	1.27234	1.37858
hSQ042714	KIR2DS2	killer cell immunoglobulin-like receptor, three domains, long cytoplasmic tail, 1::killer cell immunoglobulin-like receptor, three domains, long cytoplasmic tail, 2::killer cell immunoglobulin-like receptor, two domains, short cytoplasmic tail, 2	3807	1	3			1.3779	1.32256	1.29029	1.35097	1.3779
hSQ044710	SP1	sp1 transcription factor	6667		3			1.37602	1.37316	1.32088	1.15415	1.37602
hSQ024350	MYLK	transcribed locus::myosin light chain kinase	4638	1				1.37578	1.25619	1.21393	1.2478	1.37578
hSQ009440	CLIC1	chloride intracellular channel 1	1192		3			1.0986	1.37554	1.20283	0.964153	1.37554
hSQ000682	RPS7	ribosomal protein s7	6201			5		1.18652	1.19455	1.37538	0.939414	1.37538
hSQ019494	S100A3	s100 calcium binding protein a3	6274		3			1.32073	1.37432	1.2377	1.19389	1.37432
hSQ040114	HBQ1	hemoglobin, theta 1	3049		3			1.24405	1.37432	1.04346	1.25712	1.37432
hSQ026206	RNASE6	ribonuclease, rnase a family, k6	6039		3			1.14258	1.37391	1.2975	1.07818	1.37391
hSQ045018	EMB	embigin homolog (mouse)::embigin	133418		3			1.09673	1.3717	1.19844	1.10672	1.3717
hSQ026263	CKAP4	cytoskeleton-associated protein 4	10970		3			1.1704	1.37105	1.17227	1.08711	1.37105
hSQ043200	TLR4	toll-like receptor 4	7099		3			1.05998	1.34978	1.37058	1.11788	1.37058
hSQ038587	CECR6	cat eye syndrome chromosome region, candidate 6	27439		3			1.28262	1.36791	1.21995	0.98707	1.36791
hSQ000170	BLOC1S1	biogenesis of lysosomal organelles complex-1, subunit 1::retinol dehydrogenase 5 (11-cis/9-cis)	2647		3			1.2877	1.36739	1.28369	1.14298	1.36739
hSQ027115	VCL	vinculin	7414		3			1.1359	1.36651	1.23072	1.09873	1.36651
hSQ010348	RPLP1P7	ribosomal protein, large, p1 pseudogene 7	133609		3			1.11716	1.36617	1.28021	0.970999	1.36617
hSQ006206	RPL38	ribosomal protein l38	6169		3			1.26152	1.36588	1.29699	1.09467	1.36588
hSQ010658	FBXW11	f-box and wd repeat domain containing 11	23291		3			1.26482	1.36564	1.2721	0.822165	1.36564
hSQ037046	S100P	s100 calcium binding protein p	6286		3			1.1261	1.36352	1.21476	1.03766	1.36352
hSQ018299	2014-03-02	membrane-associated ring finger (c3hc4) 2	51257		3			1.25188	1.36281	1.15512	1.15142	1.36281
hSQ032037	RPS20	ribosomal protein s20	6224			5		1.11458	1.18523	1.3621	0.879954	1.3621
hSQ000995	LOC441113	similar to glutaredoxin (thioltransferase) (ttase)	441113		3			1.19888	1.36196	1.24392	1.18317	1.36196
hSQ005364	GNMT	glycine n-methyltransferase	27232		3			1.13657	1.36151	1.0971	0.874626	1.36151
hSQ001390	PRSS3	protease, serine, 3	5646		3			1.0791	1.32108	1.36094	1.18909	1.36094
hSQ039205	KLRC3	killer cell lectin-like receptor subfamily c, member 3	3823			5		1.01281	0.92671	1.36083	0.986526	1.36083
hSQ037845	GABRE	gamma-aminobutyric acid (gaba) a receptor, epsilon	2564		3			1.18866	1.36082	1.12599	1.32658	1.36082
hSQ039845	SELENBP1	selenium binding protein 1	8991				7	0.988514	1.05531	0.932602	1.35911	1.35911
hSQ011565	IL1RAP	interleukin 1 receptor accessory protein	3556		3			1.03469	1.35818	1.23663	1.06409	1.35818
hSQ019907	SIRPA	signal-regulatory protein alpha	140885		3			1.25806	1.35805	1.21471	0.841868	1.35805
hSQ016925	RAC1	ras-related c3 botulinum toxin substrate 1 (rho family, small gtp binding protein rac1)	5879	1				1.35624	1.22607	1.16301	1.02302	1.35624
hSQ043216	GPX4	glutathione peroxidase 4 (phospholipid hydroperoxidase)	2879		3			1.05809	1.35601	1.07584	1.28461	1.35601
hSQ005211	UBL5	ubiquitin-like 5	59286		3			1.19223	1.35566	1.25122	1.058	1.35566
hSQ034402	C17ORF76	chromosome 17 open reading frame 76	388341		3			0.863798	1.35366	0.959597	0.864082	1.35366
hSQ013969	LOC440828	similar to 40s ribosomal protein s15a	440828		3			1.02697	1.35343	1.33725	0.988263	1.35343
hSQ022932	PLBD1	phospholipase b domain containing 1	79887		3			1.06141	1.35205	1.11193	0.949079	1.35205
hSQ008166	HERC6	hect domain and rld 6	55008			5		1.19823	1.00637	1.35189	1.18011	1.35189
hSQ035204	SMARCC1	swi/snf related, matrix associated, actin dependent regulator of chromatin, subfamily c, member 1	6599	1				1.35066	1.08975	1.1868	0.864837	1.35066
hSQ021588	SLC2A5	solute carrier family 2 (facilitated glucose/fructose transporter), member 5	6518	1				1.35004	1.08156	1.16544	1.04184	1.35004
hSQ012570	TK1	thymidine kinase 1, soluble	7083		3			1.14446	1.34991	1.08289	1.27869	1.34991
hSQ019109	CYB5R1	cytochrome b5 reductase 1	51706		3			1.13761	1.34848	1.18154	0.944747	1.34848
hSQ044036	CCDC159	coiled-coil domain containing 159	126075		3			1.33534	1.34823	1.21219	1.08431	1.34823
hSQ014927	ZBTB47	zinc finger and btb domain containing 47	92999		3			1.22332	1.34783	1.18036	1.01054	1.34783
hSQ011322	RPL27A	ribosomal protein l27a	6157			5		1.15082	1.25122	1.34772	0.892506	1.34772
hSQ022788	ZNFX1	zinc finger, nfx1-type containing 1	57169	1				1.3449	1.25238	1.28803	1.1028	1.3449
hSQ013469	COL15A1	collagen, type xv, alpha 1	1306		3			1.1151	1.34406	1.0741	0.797229	1.34406
hSQ029041	CCDC88B	coiled-coil domain containing 88b	283234	1				1.34394	1.09016	1.20835	0.960845	1.34394
hSQ012923	FNDC3B	fibronectin type iii domain containing 3b	64778		3			1.1057	1.34363	1.05169	0.834397	1.34363
hSQ015752	S100A11	s100 calcium binding protein a11	6282		3			1.19265	1.34223	1.11044	1.07261	1.34223
hSQ016491	HIST1H4K	histone cluster 1, h4k	8362		3			1.13942	1.3416	1.19554	1.04392	1.3416
hSQ022900	MYL9	myosin, light chain 9, regulatory	10398		3	5		1.33985	1.20772	1.31288	1.14927	1.33985
hSQ018150	PARP10	poly (adp-ribose) polymerase family, member 10	84875	1				1.33962	1.19097	1.30063	1.05635	1.33962
hSQ038154	OC90	otoconin 90	137202		3			1.18159	1.33878		1.21433	1.33878
hSQ002850	TCEB2P2	transcription elongation factor b (siii), polypeptide 2 (18kda, elongin b) pseudogene 2	253665		3			1.16315	1.33867	1.08682	1.10223	1.33867
hSQ041608	LOC391035	similar to ribosomal protein s15a	391035			5		1.03109	1.29549	1.33839	1.03204	1.33839
hSQ011870	SEPX1	selenoprotein x, 1	51734		3			1.04607	1.33824	1.06826	0.877822	1.33824
hSQ020578	SH3BGRL3	sh3 domain binding glutamic acid-rich protein like 3	83442		3			1.23186	1.33715	1.11819	1.11922	1.33715
hSQ038911	ST6GALNAC2	st6 (alpha-n-acetyl-neuraminyl-2,3-beta-galactosyl-1,3)-n-acetylgalactosaminide alpha-2,6-sialyltransferase 2	10610		3			1.07078	1.33715	1.0242	0.802697	1.33715
hSQ038412	LOC400724	hypothetical gene supported by ak093729; ak128780; bx647918; nm_198284	400724		3			1.11608	1.33683	1.2187	1.00404	1.33683
hSQ020723	FCGR2A	fc fragment of igg, low affinity iia, receptor (cd32)	2212		3			1.01291	1.33654	1.13197	1.01595	1.33654
hSQ016049	RPS18P12	cdna clone image:6654805::ribosomal protein s18 pseudogene 12	388339		3			1.04548	1.33623	1.29489	1.0022	1.33623
hSQ043203	MYL12A	myosin, light chain 12a, regulatory, non-sarcomeric	10627		3			1.19306	1.33606	1.29837	1.21948	1.33606
hSQ030908	CD300LB	cd300 molecule-like family member b	124599		3			1.16378	1.33417	1.21739		1.33417
hSQ037955	MT1P3	metallothionein 1 pseudogene 3	140851		3	5		1.31473	1.33306	1.32451	1.07222	1.33306
hSQ028024	ADAR	adenosine deaminase, rna-specific	103	1				1.33304	1.13616	1.26707	1.1409	1.33304
hSQ026838	MBOAT7	membrane bound o-acyltransferase domain containing 7	79143		3			1.2266	1.33096	1.13047	0.939016	1.33096
hSQ009961	ARPC2	actin related protein 2/3 complex, subunit 2, 34kda	10109		3			1.22674	1.33068	1.29909	0.987259	1.33068
hSQ038251	RPS29	ribosomal protein s29	6235		3	5		1.07505	1.32953	1.31564	1.05184	1.32953
hSQ000632	DHRS7	dehydrogenase/reductase (sdr family) member 7	51635		3			0.933464	1.32869	1.12967	0.928377	1.32869
hSQ017294	SIGLEC5	sialic acid binding ig-like lectin 5	8778		3			1.11755	1.32869	1.15189	1.01378	1.32869
hSQ008980	PDLIM7	pdz and lim domain 7 (enigma)	9260		3			1.22626	1.32798	1.14776	1.07447	1.32798
hSQ034329	PHF20L1	phd finger protein 20-like 1	51105		3			1.08316	1.32792	1.21145	1.1169	1.32792
hSQ017490	C14ORF2	chromosome 14 open reading frame 2	9556		3	5		1.15977	1.31722	1.32761	1.01361	1.32761
hSQ022100	ALOX5	arachidonate 5-lipoxygenase	240		3			0.987532	1.32736	1.08345	0.983161	1.32736
hSQ023472	RPL41	ribosomal protein l41	6171			5		1.09184	1.20705	1.32662	0.882106	1.32662
hSQ025656	C10ORF54	chromosome 10 open reading frame 54	64115		3			1.21981	1.32656	1.26121	1.07228	1.32656
hSQ027223	FTH1P11	ferritin, heavy polypeptide 1 pseudogene 11	2503		3			1.12164	1.32645	1.04092	0.988019	1.32645
hSQ026697	COX16	cox16 cytochrome c oxidase assembly homolog (s. cerevisiae)	51241			5		0.983401	1.10305	1.32547	0.97795	1.32547
hSQ014434	HINT1	histidine triad nucleotide binding protein 1	3094		3			1.12519	1.30964	1.32455	1.02776	1.32455
hSQ019128	SQRDL	sulfide quinone reductase-like (yeast)	58472		3			1.18334	1.32417	1.13721	1.10983	1.32417
hSQ015833	RPS6P13	ribosomal protein s6 pseudogene 13	392358		3			1.06849	1.32409	1.13795	0.918488	1.32409
hSQ036682	GRN	granulin	2896		3			1.3225	1.32342	1.25484	1.10431	1.32342
hSQ032763	HGF	hepatocyte growth factor (hepapoietin a; scatter factor)	3082			5		1.13222	1.15907	1.32321	0.881663	1.32321
hSQ029238	RPS27	ribosomal protein s27	6232		3	5		1.13592	1.31826	1.32317	1.08614	1.32317
hSQ028207	FTSJD2	ftsj methyltransferase domain containing 2	23070			5		1.2421	1.10496	1.32215	1.05802	1.32215
hSQ010372	IFITM3	interferon induced transmembrane protein 3::interferon induced transmembrane protein 3 (1-8u)	10410		3			1.08613	1.32197	1.21962	1.02612	1.32197
hSQ005756	NCRNA00152	long intergenic non-protein coding rna 152::non-protein coding rna 152	112597		3			1.15469	1.32149	1.27294	1.04935	1.32149
hSQ037087	C10ORF32	chromosome 10 open reading frame 32::arsenic (+3 oxidation state) methyltransferase	119032	1				1.32148	1.06716	1.11726	0.878213	1.32148
hSQ000190	FCGRT	fc fragment of igg, receptor, transporter, alpha	2217		3			1.23371	1.32103	1.14367	0.96215	1.32103
hSQ012025	PRDM1	pr domain containing 1, with znf domain	639		3			1.05971	1.32094	1.24833	1.15289	1.32094
hSQ011482	ZNF267	zinc finger protein 267	10308			5		0.866853	0.885931	1.32075	1.0778	1.32075
hSQ015425	GSN	gelsolin	2934		3			1.21602	1.32042	1.10267	1.01279	1.32042
hSQ022570	CPD	carboxypeptidase d	1362		3			1.12736	1.31985	1.17774	0.885461	1.31985
hSQ015994	OGFRL1	opioid growth factor receptor-like 1	79627		3			1.04285	1.31976	1.18747	0.833851	1.31976
hSQ039078	ATP5L	atp synthase, h+ transporting, mitochondrial fo complex, subunit g	10632		3			1.25963	1.3189	1.20497	1.05946	1.3189
hSQ002059	ZBTB16	zinc finger and btb domain containing 16	7704	1				1.31727	1.1141	1.20053	1.12494	1.31727
hSQ020567	LENG8	leukocyte receptor cluster (lrc) member 8	114823	1				1.31692	1.00556	1.21062	0.954952	1.31692
hSQ041954	TRIM5	tripartite motif containing 5	85363			5		1.09742	1.21618	1.31625	1.17157	1.31625
hSQ030356	ATP13A1	atpase type 13a1	57130	1				1.31588	1.0814	1.2386	1.03042	1.31588
hSQ004517	FYB	fyn binding protein	2533		3			1.21237	1.3157	1.26942	1.15591	1.3157
hSQ008616	RPLP1	ribosomal protein, large, p1	6176		3	5		1.14153	1.3157	1.26536	0.928839	1.3157
hSQ015593	C19ORF66	chromosome 19 open reading frame 66	55337	1				1.31564	1.14512	1.22346	1.08937	1.31564
hSQ031141	ACPP	acid phosphatase, prostate	55		3			1.03422	1.31545	1.27537	1.11463	1.31545
hSQ041318	HSBP1L1	heat shock factor binding protein 1-like 1	440498		3			1.12923	1.31494	1.22264	1.11884	1.31494
hSQ028425	ARG2	arginase, type ii	384		3			1.00394	1.31494	1.06708	0.875594	1.31494
hSQ007671	LOC254896	hypothetical loc254896	254896		3			1.04357	1.31359	1.19902	1.00864	1.31359
hSQ027327	EFHD2	ef-hand domain family, member d2	79180		3			1.20022	1.31344	1.09407	1.01302	1.31344
hSQ011498	CCDC153	coiled-coil domain containing 153	283152		3			1.18644	1.31248	1.14375	0.829211	1.31248
hSQ007805	CFD	complement factor d (adipsin)	1675		3			1.30641	1.31167	1.24663	1.13842	1.31167
hSQ021299	RPS3A	ribosomal protein s3a	6189			5		1.12233	1.15991	1.30991	0.824702	1.30991
hSQ031595	APOL6	apolipoprotein l, 6	80830				7	1.14617	1.20233	1.24114	1.30806	1.30806
hSQ003709	CEBPD	ccaat/enhancer binding protein (c/ebp), delta	1052		3			1.20428	1.30787	1.18376	1.01499	1.30787
hSQ036628	ALPK1	alpha-kinase 1	80216			5		1.16527	1.10318	1.30646	1.2589	1.30646
hSQ015929	SYNGR4	synaptogyrin 4	23546			5		1.18463	1.28758	1.30578	1.08899	1.30578
hSQ014684	RPS17P5	ribosomal protein s17 pseudogene 5	442216		3			1.12577	1.30536	1.29514	0.96779	1.30536
hSQ001170	ST3GAL4	st3 beta-galactoside alpha-2,3-sialyltransferase 4	6484		3			1.03934	1.30458	1.16554	0.884132	1.30458
hSQ020488	FAM100A	family with sequence similarity 100, member a	124402	1				1.3039	1.15229	1.03156	1.23619	1.3039
hSQ034319	YOD1	yod1 otu deubiquinating enzyme 1 homolog (s. cerevisiae)	55432	1				0.679384	0.941986	0.953915	1.3039	1.3039
hSQ028121	RRBP1	ribosome binding protein 1 homolog 180kda (dog)	6238	1				1.30375	1.05843	1.07066	0.983388	1.30375
hSQ011124	RHOG	ras homolog gene family, member g (rho g)	391		3			1.21991	1.30272	1.12562	1.05142	1.30272
hSQ028786	MT-TM	mitochondrially encoded trna methionine	4569	1				1.30157	1.29786	1.23081	0.947179	1.30157
hSQ044392	MSRA	methionine sulfoxide reductase a	4482		3			1.10076	1.30149	1.18386	1.03231	1.30149
hSQ010216	LOC440927	transcribed locus, strongly similar to np_061341.1 60s acidic ribosomal protein p1 [mus musculus]::similar to ribosomal protein p1 isoform 2	440927		3			1.07162	1.30145	1.27547	0.927209	1.30145
hSQ035445	MEPCE	methylphosphate capping enzyme	56257		3			1.17102	1.30039	1.15941	1.00569	1.30039
hSQ009150	FAM111B	family with sequence similarity 111, member b	374393	1				2.72687	1.15508	0.999684	1.15203	2.72687
hSQ030849	LRP4	low density lipoprotein receptor-related protein 4	4038	1				2.62392	1.32241	1.32588	1.53035	2.62392
hSQ034696	PLCB1	phospholipase c, beta 1 (phosphoinositide-specific)	23236				7	1.27275	1.49225	1.05974	2.59593	2.59593
hSQ012459	GRHL1	grainyhead-like 1 (drosophila)	29841		3			1.06647	2.43316	1.13669	1.27177	2.43316
hSQ004236	TRIM29	tripartite motif containing 29	23650	1				2.20932	0.938235	1.39692	0.910108	2.20932
hSQ027942	CCNE2	cyclin e2	9134	1			7	1.15505	1.08948	0.867408	2.20837	2.20837
hSQ032929	VAT1L	vesicle amine transport protein 1 homolog (t. californica)-like	57687	1				2.14042	1.29251	1.1573	1.02605	2.14042
hSQ031363	C2ORF69	chromosome 2 open reading frame 69	205327	1				2.09462	1.11767	0.852143	1.07293	2.09462
hSQ000580	FAM3C	family with sequence similarity 3, member c	10447	1				2.06511	0.791478	0.818658	0.873207	2.06511
hSQ027240	TCTN2	tectonic family member 2	79867	1				1.98527	1.05518	1.02768	0.960215	1.98527
hSQ027930	STAG3L4	stromal antigen 3-like 4	64940	1				1.96558	0.992634	0.915152	0.94309	1.96558
hSQ000989	PLXNC1	plexin c1	10154		3			1.55581	1.95342	1.32807	0.929805	1.95342
hSQ025215	ARHGAP33	rho gtpase activating protein 33	115703	1				1.94801	0.97041	1.15776	1.07668	1.94801
hSQ026773	DUSP1	dual specificity phosphatase 1	1843		3			1.13984	1.89015	1.55455	1.37876	1.89015
hSQ025519	CHI3L1	chitinase 3-like 1 (cartilage glycoprotein-39)	1116	1				1.85725	1.12849	1.3293	0.8612	1.85725
hSQ043357	SLC30A5	solute carrier family 30 (zinc transporter), member 5	64924		3			1.05395	1.83992	0.910617	0.938302	1.83992
hSQ029028	DQX1	deaq box rna-dependent atpase 1	165545	1				1.83741	0.978695	1.41616	1.0883	1.83741
hSQ016232	RFX7	regulatory factor x, 7::transcribed locus	64864		3			1.28212	1.81796	1.38866	1.07928	1.81796
hSQ042038	TSC22D3	tsc22 domain family, member 3	1831		3			1.25584	1.79461	1.28946	1.23314	1.79461
hSQ041096	ZNF500	zinc finger protein 500	26048	1				1.78445	0.823134	0.91676	1.03025	1.78445
hSQ010115	IGF2AS	insulin-like growth factor 2 antisense	51214	1				1.77602	1.11203	1.02553	1.01457	1.77602
hSQ033295	UCK1	uridine-cytidine kinase 1	83549	1				1.76033	0.995145	0.926588	0.915704	1.76033
hSQ009637	SCCPDH	saccharopine dehydrogenase (putative)	51097	1				1.75878	1.51298	0.759594	1.2999	1.75878
hSQ016376	OLIG2	oligodendrocyte lineage transcription factor 2	10215	1				1.7543	0.878703	0.752293	0.985122	1.7543
hSQ033412	DSCR8	down syndrome critical region gene 8	84677	1				1.73974	1.18506	0.925612	1.13129	1.73974
hSQ027851	RBPJ	recombination signal binding protein for immunoglobulin kappa j region	3516		3			0.903774	1.73869	1.26898	1.19734	1.73869
hSQ009761	LAMA5	laminin, alpha 5	3911	1				1.72848	0.911446	0.960706	0.99103	1.72848
hSQ036667	MDM2	mdm2 p53 binding protein homolog (mouse)	4193		3			1.25628	1.71751	1.57595	1.17004	1.71751
hSQ037559	NFIB	nuclear factor i/b	4781	1				1.69658	1.09334	1.04696	0.961277	1.69658
hSQ041550	PTBP1	polypyrimidine tract binding protein 1	5725	1				1.69181	0.946522	1.08413	1.02162	1.69181
hSQ028641	ROM1	retinal outer segment membrane protein 1	6094	1				1.66845	0.905712	0.983957	1.14112	1.66845
hSQ039911	MGC11082	transcribed locus::hypothetical loc84777	84777	1				1.66837	0.984178	0.920964	1.04609	1.66837
hSQ009895	NCRNA_U28_5	ucsc_hg16		1				1.66406	1.03297	1.08335	1.18193	1.66406
hSQ034028	SIRT5	hypothetical protein loc285813::sirtuin 5	23408	1				1.66049	0.908304	0.902483	0.887432	1.66049
hSQ017730	NDUFA4L2	nadh dehydrogenase (ubiquinone) 1 alpha subcomplex, 4-like 2	56901	1				1.64901	1.00225	0.958743	1.04424	1.64901
hSQ038735	KIF11	kinesin family member 11	3832	1				1.64491	1.30903	0.803866	0.968505	1.64491
hSQ011116	AHSA2	aha1, activator of heat shock 90kda protein atpase homolog 2 (yeast)	130872	1				1.64488	0.982707	0.972953	1.19498	1.64488
hSQ001448	CPK	activating transcription factor 3	467	1				1.63238	1.27315	1.41488	1.13634	1.63238
hSQ008814	VAV2	vav 2 guanine nucleotide exchange factor	7410	1				1.62754	1.25965	0.872118	0.886003	1.62754
hSQ025166	AQP10	aquaporin 10	89872	1				1.60761	0.928541	1.11709	1.29674	1.60761
hSQ006477	ERC1	transcribed locus::elks/rab6-interacting/cast family member 1	23085		3			1.13951	1.5925	1.18924	1.6696	1.5925
hSQ017973	ZNF837	zinc finger protein 837	116412	1				1.58356	1.10701	1.13001	1.07153	1.58356
hSQ028155	PROCR	protein c receptor, endothelial	10544	1				1.57809	0.891808	0.985153	0.855496	1.57809
hSQ038079	CDCP1	cub domain containing protein 1	64866	1				1.57685	0.952308	1.02608	0.874186	1.57685
hSQ010469	ITFG3	integrin alpha fg-gap repeat containing 3	83986	1				1.56966	0.972531	0.985826	1.06497	1.56966
hSQ012791	STAG3	stromal antigen 3	10734	1				1.5669	1.04494	1.11275	1.12601	1.5669
hSQ013196	PDK4	pyruvate dehydrogenase kinase, isozyme 4	5166		3		7	1.22717	0.554272	0.739779	0.36543	-2.7365
hSQ012573	TMEM165	transmembrane protein 165	55858		3			0.817304	0.569066	1.08181	0.92624	-1.75727
hSQ044150	MMP1	matrix metallopeptidase 1 (interstitial collagenase)	4312	1			7	0.593075	0.847435	0.679544	0.574387	-1.74099
hSQ021451	DR1	down-regulator of transcription 1, tbp-binding (negative cofactor 2)	1810	1	3		7	0.604299	0.58269	0.830086	0.682599	-1.71618
hSQ009622	NTN4	netrin 4	59277	1	3			0.609036	0.598222	0.824923	0.719974	-1.67162
hSQ003801	KIAA1033	kiaa1033	23325		3			0.858004	0.599882	1.20316	0.986518	-1.667
hSQ023495	SLC39A6	transcribed locus::solute carrier family 39 (zinc transporter), member 6	25800	1	3			0.666898	0.609008	0.811596	0.800053	-1.64201
hSQ038841	PCMTD2	protein-l-isoaspartate (d-aspartate) o-methyltransferase domain containing 2	55251	1	3			0.639216	0.609416	0.995439	0.788355	-1.64091
hSQ024781	SLC25A20	solute carrier family 25 (carnitine/acylcarnitine translocase), member 20	788				7	1.14145	1.03359	0.828745	0.629451	-1.58869
hSQ014216	SEC23A	sec23 homolog a (s. cerevisiae)	10484	1	3			0.650393	0.630164	0.899067	0.756389	-1.58689
hSQ007285	CCNC	cyclin c	892		3			0.808923	0.630689	1.09003	0.905425	-1.58557
hSQ005221	KIAA1715	kiaa1715	80856		3			1.09581	0.632148	0.890076	0.715654	-1.58191
hSQ006378	GLCCI1	glucocorticoid induced transcript 1	113263	1	3			0.72951	0.634635	1.01907	0.873977	-1.57571
hSQ034811	NFYB	nuclear transcription factor y, beta	4801		3		7	0.720382	0.635736	1.1495	0.857376	-1.57298
hSQ035319	TTC32	tetratricopeptide repeat domain 32	130502	1	3			0.697546	0.635989	1.05256	0.805041	-1.57235
hSQ009179	IPMK	inositol polyphosphate multikinase	253430		3		7	0.687238	0.636947	0.838052	0.652086	-1.56999
hSQ035934	OXR1	oxidation resistance 1	55074	1	3		7	0.637901	0.665284	0.97453	0.702519	-1.56764
hSQ036677	CCNG1	cyclin g1	900	1				0.643643	0.815732	1.03455	0.818091	-1.55366
hSQ044292	ZNF367	zinc finger protein 367	195828	1	3			0.694077	0.644432	0.910986	0.840023	-1.55175
hSQ015488	CHMP2B	chromatin modifying protein 2b	25978	1	3			0.650566	0.714076	0.877568	0.783859	-1.53712
hSQ024845	FAM122B	family with sequence similarity 122b	159090	1	3			0.67424	0.650821	0.951538	0.789494	-1.53652
hSQ045198	ENPP4	ectonucleotide pyrophosphatase/phosphodiesterase 4 (putative)	22875		3			1.09758	0.652643	1.27829	1.21331	-1.53223
hSQ028366	USP1	ubiquitin specific peptidase 1	7398	1	3		7	0.664036	0.652945	1.10407	0.679557	-1.53152
hSQ023425	MPZL2	myelin protein zero-like 2	10205				7	0.802181	1.03663	0.732381	0.653836	-1.52944
hSQ039942	CMTM8	cklf-like marvel transmembrane domain containing 8	152189	1	3		7	0.672817	0.752998	0.876051	0.654585	-1.52769
hSQ028888	PRNP	prion protein	5621	1	3			0.709726	0.654743	0.905634	0.794618	-1.52732
hSQ025416	BMI1	bmi1 polycomb ring finger oncogene	648	1	3			0.682468	0.659983	1.00446	0.769415	-1.51519
hSQ042473	ZMAT1	zinc finger, matrin-type 1	84460	1	3			0.662252	0.660211	1.02769	0.868742	-1.51467
hSQ026329	ZFP36L2	zinc finger protein 36, c3h type-like 2	678		3			0.730227	0.660841	0.831238	0.779175	-1.51322
hSQ032816	HDAC9	histone deacetylase 9	9734	1	3		7	0.694799	0.704986	0.901459	0.665265	-1.50316
hSQ018623	ZBTB10	zinc finger and btb domain containing 10	65986	1	3			0.739587	0.666615	0.915311	0.769504	-1.50012
hSQ044517	HHEX	hematopoietically expressed homeobox	3087		3		7	0.736198	0.749413	0.840994	0.668964	-1.49485
hSQ023771	LRP11	low density lipoprotein receptor-related protein 11	84918		3			0.772264	0.66952	0.946036	0.809854	-1.49361
hSQ028812	STK17B	serine/threonine kinase 17b	9262	1				0.671209	0.822355	1.06326	0.791777	-1.48985
hSQ045029	DMD	dystrophin	1756	1			7	0.748499	0.82296	0.957607	0.674999	-1.48148
hSQ038292	LDB2	lim domain binding 2::transcribed locus	9079		3			0.79924	0.676698	0.886873	0.82028	-1.47776
hSQ045207	RNF138	ring finger protein 138	51444		3			1.04874	0.679593	1.06006	1.02148	-1.47147
hSQ010959	PDP1	pyruvate dehyrogenase phosphatase catalytic subunit 1	54704	1	3			0.756197	0.679604	1.04621	0.823686	-1.47144
hSQ033738	SREK1	splicing regulatory glutamine/lysine-rich protein 1	140890	1	3			0.712053	0.68105	1.0125	0.835184	-1.46832
hSQ007288	KLF9	kruppel-like factor 9	687	1	3			0.681171	0.751339	1.01794	0.878938	-1.46806
hSQ006956	NR3C1	nuclear receptor subfamily 3, group c, member 1 (glucocorticoid receptor)	2908	1	3			0.720396	0.681239	1.05971	1.03002	-1.46791
hSQ029619	TMEM66	transmembrane protein 66	51669	1	3			0.681365	0.743721	0.929483	0.769948	-1.46764
hSQ045530	NCRNA_ACA4_14	ucsc_hg16	0		3			0.811867	0.683099	1.04447	0.907372	-1.46392
hSQ033462	HSPH1	heat shock 105kda/110kda protein 1	10808		3			1.03562	0.683618	1.04379	1.06868	-1.46281
hSQ021275	CXCR7	chemokine (c-x-c motif) receptor 7	57007	1	3			0.684442	0.691755	0.749327	0.687294	-1.46104
hSQ036515	AZIN1	antizyme inhibitor 1	51582	1	3		7	0.728079	0.684679	0.86085	0.74924	-1.46054
hSQ014201	IKZF5	ikaros family zinc finger 5 (pegasus)	64376	1	3			0.704009	0.685075	0.917937	0.808694	-1.45969
hSQ017440	RAD50	rad50 homolog (s. cerevisiae)	10111		3			1.04006	0.685787	1.07338	0.915287	-1.45818
hSQ018984	KIAA1430	kiaa1430	57587	1	3			0.686544	0.729655	0.982821	0.803467	-1.45657
hSQ019654	RPL23AP32	spectrin, beta, non-erythrocytic 1::ribosomal protein l23a pseudogene 32	56969	1				0.686705	0.787224	1.00953	1.01692	-1.45623
hSQ008052	STXBP6	syntaxin binding protein 6 (amisyn)	29091		3			0.792363	0.687236	0.937586	0.826082	-1.4551
hSQ003991	SLC4A7	solute carrier family 4, sodium bicarbonate cotransporter, member 7	9497	1				0.687552	0.844173	1.1039	0.94224	-1.45443
hSQ042588	AASDHPPT	aminoadipate-semialdehyde dehydrogenase-phosphopantetheinyl transferase	60496	1	3			0.687612	0.7103	1.02363	0.856485	-1.45431
hSQ011505	TANC1	tetratricopeptide repeat, ankyrin repeat and coiled-coil containing 1	85461	1	3			0.715224	0.687691	0.991923	0.823686	-1.45414
hSQ029394	CHORDC1	cysteine and histidine-rich domain (chord) containing 1	26973		3			0.777115	0.687744	0.897953	0.924685	-1.45403
hSQ010497	PHF6	phd finger protein 6	84295	1	3			0.714613	0.688009	1.06297	0.80413	-1.45347
hSQ024974	ACTR2	arp2 actin-related protein 2 homolog (yeast)::transcribed locus, strongly similar to xp_002799337.1 predicted: hypothetical protein loc100427240 [macaca mulatta]	10097	1	3		7	0.688566	0.714084	1.00254	0.76631	-1.45229
hSQ032971	TIA1	tia1 cytotoxic granule-associated rna binding protein	7072	1	3			0.763623	0.68984	1.0761	0.772461	-1.44961
hSQ024773	DMXL1	dmx-like 1	1657	1	3			0.763557	0.690141	1.03844	0.879293	-1.44898
hSQ017708	TMEM123	transmembrane protein 123	114908	1	3			0.690478	0.714167	1.03065	0.91764	-1.44827
hSQ035169	IMPAD1	inositol monophosphatase domain containing 1	54928		3			0.773306	0.691052	1.06314	0.782918	-1.44707
hSQ001269	SLC38A2	solute carrier family 38, member 2	54407	1	3			0.691995	0.742553	0.857408	0.832292	-1.4451
hSQ021472	NCKAP5	nck-associated protein 5	344148		3			0.780837	0.692939	0.815609	0.779535	-1.44313
hSQ032474	ZMIZ1	zinc finger, miz-type containing 1	57178		3			0.803016	0.693115	0.891619	0.807854	-1.44276
hSQ027551	ZNF770	transcribed locus::zinc finger protein 770	54989		3			0.797002	0.693297	1.07037	0.829678	-1.44238
hSQ042590	CNN3	calponin 3, acidic	1266	1				0.694077	0.903231	0.92477	0.825401	-1.44076
hSQ002721	UST	uronyl-2-sulfotransferase	10090	1	3		7	0.695237	0.753028	1.0143	0.723032	-1.43836
hSQ009653	SLC19A2	solute carrier family 19 (thiamine transporter), member 2	10560	1	3			0.695521	0.728584	1.07821	0.862442	-1.43777
hSQ014277	TMEM161B	transmembrane protein 161b	153396	1	3			0.70574	0.695859	1.02949	0.865887	-1.43707
hSQ036913	PTGS2	prostaglandin-endoperoxide synthase 2 (prostaglandin g/h synthase and cyclooxygenase)	5743	1				0.695859	1.00865	0.943046	0.837237	-1.43707
hSQ042627	LOC285628	hypothetical protein loc285628	285628	1				0.696728	0.808003	1.01769	0.913409	-1.43528
hSQ009685	WSB1	wd repeat and socs box containing 1	26118	1	3		7	0.732297	0.752725	1.04495	0.696767	-1.4352
hSQ025144	HLTF	helicase-like transcription factor	6596	1	3			0.726919	0.698517	0.69736	0.792802	-1.43398
hSQ010984	GMFB	glia maturation factor, beta	2764		3		7	0.733764	0.697775	1.12857	0.710267	-1.43313
hSQ010666	TMEM30A	transmembrane protein 30a	55754	1	3			0.698339	0.709562	1.04343	0.79572	-1.43197
hSQ015686	CD1C	cd1c molecule	911				7	0.767994	0.774408	0.848214	0.698743	-1.43114
hSQ028535	ATAD1	atpase family, aaa domain containing 1	84896		3			0.771857	0.699608	1.02023	0.887623	-1.42937
hSQ018322	PIKFYVE	phosphoinositide kinase, fyve finger containing	200576	1				0.700278	0.775985	0.956387	0.807947	-1.428
hSQ002650	SS18	synovial sarcoma translocation, chromosome 18	6760	1	3			0.758647	0.700359	1.02814	0.827692	-1.42784
hSQ033733	IFT80	intraflagellar transport 80 homolog (chlamydomonas)	57560	1	3			0.753416	0.700683	1.11372	0.847195	-1.42718
hSQ034950	GDI2	gdp dissociation inhibitor 2	2665	1	3		7	0.701169	0.764012	1.09114	0.82521	-1.42619
hSQ017479	SGK1	serum/glucocorticoid regulated kinase 1	6446	1			7	0.702888	0.835377	0.869646	0.732635	-1.4227
hSQ031925	CENPC1	centromere protein c 1	1060	1	3			0.76313	0.703034	1.01341	0.824734	-1.42241
hSQ031395	RBM27	rna binding motif protein 27	54439	1	3			0.742605	0.70344	0.84012	0.772978	-1.42158
hSQ001314	PMAIP1	phorbol-12-myristate-13-acetate-induced protein 1	5366		3			1.14621	0.704306	1.08385	0.867639	-1.41984
hSQ024750	SSPN	sarcospan (kras oncogene-associated gene)	8082		3		7	0.819538	0.704542	0.925218	0.756072	-1.41936
hSQ003717	CCDC41	coiled-coil domain containing 41	51134		3			0.734075	0.705638	1.0156	0.892341	-1.41716
hSQ003285	PNN	pinin, desmosome associated protein	5411		3			0.793884	0.705964	0.99103	0.882091	-1.4165
hSQ011069	KCNMB4	potassium large conductance calcium-activated channel, subfamily m, beta member 4	27345	1			7	0.752276	0.829703	0.873169	0.706617	-1.41519
hSQ030189	MIER3	mesoderm induction early response 1, family member 3	166968				7	0.783063	0.791013	0.905482	0.706995	-1.41444
hSQ037100	NAA50	n-acetyltransferase 13::n(alpha)-acetyltransferase 50, nate catalytic subunit	80218		3			0.76826	0.707761	0.940391	0.844011	-1.41291
hSQ000036	FAM178A	family with sequence similarity 178, member a	55719		3			1.05786	0.708077	1.19575	1.11791	-1.41228
hSQ016900	LOC401307	hypothetical gene supported by ak027125	401307		3			0.830494	0.708088	1.03463	0.914901	-1.41225
hSQ013696	ZBTB11	zinc finger and btb domain containing 11	27107	1	3			0.708219	0.757666	1.03484	0.859214	-1.41199
hSQ026632	TPD52	tumor protein d52	7163	1	3		7	0.729238	0.708464	0.825463	0.732371	-1.4115
hSQ033156	LONRF3	lon peptidase n-terminal domain and ring finger 3	79836				7	0.83852	0.944595	0.8502	0.709222	-1.41
hSQ025897	TCTN1	tectonic family member 1	79600				7	0.795137	1.02699	1.03259	0.709922	-1.4086
hSQ042807	CREBL2	camp responsive element binding protein-like 2	1389	1				0.710957	0.791777	0.905299	0.814413	-1.40656
hSQ020121	BIRC3	baculoviral iap repeat containing 3	330		3			0.726441	0.711614	1.00537	0.836652	-1.40526
hSQ001979	ZBTB44	zinc finger and btb domain containing 44	29068	1	3			0.712107	0.73433	0.946367	1.21781	-1.40428
hSQ001961	ANKRD46	transcribed locus::ankyrin repeat domain 46	157567	1	3			0.71392	0.712436	0.92001	0.792509	-1.40363
hSQ033367	SERP1	stress-associated endoplasmic reticulum protein 1	27230	1	3			0.712519	0.736113	0.906492	0.771284	-1.40347
hSQ033906	PM20D2	peptidase m20 domain containing 2	135293	1	3			0.716299	0.712606	0.927981	0.83673	-1.4033
hSQ000386	CREBZF	creb/atf bzip transcription factor	58487	1	3			0.713802	0.731741	1.05859	0.858784	-1.40095
hSQ003377	ZNF594	zinc finger protein 594	84622				7	0.867061	0.864645	0.972417	0.715041	-1.39852
hSQ013865	KIAA1468	kiaa1468	57614		3			0.753406	0.715984	1.11955	0.812159	-1.39668
hSQ005513	SNAP23	synaptosomal-associated protein, 23kda::transcribed locus	8773	1				0.718221	0.781547	1.02624	0.807947	-1.39233
hSQ044345	KBTBD6	kelch repeat and btb (poz) domain containing 6	89890	1	3			1.05226	0.718885	1.04351	1.07942	-1.39104
hSQ022674	BTBD3	btb (poz) domain containing 3::transcribed locus	22903	1	3			0.719301	0.719999	0.892629	0.7762	-1.39024
hSQ023059	GLMN	glomulin, fkbp associated protein	11146		3			0.842932	0.719903	1.12272	1.04112	-1.38908
hSQ004204	STAG2	stromal antigen 2	10735	1				0.721177	0.881867	1.0335	0.89969	-1.38662
hSQ034649	ZDHHC20	zinc finger, dhhc-type containing 20	253832		3			0.721548	0.733651	1.08743	0.829927	-1.38591
hSQ026649	PNRC2	proline-rich nuclear receptor coactivator 2	55629	1	3			0.722104	0.736156	0.939718	0.839926	-1.38484
hSQ039898	MAN1A1	mannosidase, alpha, class 1a, member 1	4121		3			0.793444	0.722298	1.00533	0.919975	-1.38447
hSQ024024	CBR4	carbonyl reductase 4	84869	1	3			0.723447	0.72234	0.941769	0.804139	-1.38439
hSQ040722	ZNF146	zinc finger protein 146	7705		3			0.848998	0.722716	1.0115	0.828266	-1.38367
hSQ044526	ZRANB2	zinc finger, ran-binding domain containing 2	9406	1				0.722841	0.853384	1.08937	0.928771	-1.38343
hSQ005353	ANKRD26	ankyrin repeat domain 26	22852		3			0.908778	0.722966	1.23913	0.888761	-1.38319
hSQ040524	FRMD4B	ferm domain containing 4b::transcribed locus	23150		3			0.974107	0.723936	1.29471	1.18941	-1.38134
hSQ044471	TPST1	tyrosylprotein sulfotransferase 1	8460				7	0.993633	1.00852	0.978176	0.724555	-1.38016
hSQ025337	TTC3	tetratricopeptide repeat domain 3	7267		3			0.795996	0.725543	1.11785	1.06462	-1.37828
hSQ045340	TMX3	thioredoxin-related transmembrane protein 3	54495	1	3			0.725958	0.727827	0.992621	0.850818	-1.37749
hSQ014424	CD44	cd44 molecule (indian blood group)	960	1				0.726315	1.03882	1.05552	1.02936	-1.37681
hSQ011895	APPL1	adaptor protein, phosphotyrosine interaction, ph domain and leucine zipper containing 1	26060	1	3			0.72665	0.743979	0.952176	0.836073	-1.37618
hSQ045543	DOK5	docking protein 5	55816				7	0.840193	0.998958	0.8285	0.727	-1.37552
hSQ023194	FIGNL1	fidgetin-like 1	63979	1	3			0.741773	0.727883	0.902357	0.783482	-1.37385
hSQ012631	SMC3	structural maintenance of chromosomes 3	9126		3			0.740891	0.728023	0.91088	0.776289	-1.37358
hSQ032328	HNRNPH3	heterogeneous nuclear ribonucleoprotein h3 (2h9)	3189		3			0.742545	0.728352	0.939197	0.807294	-1.37296
hSQ014180	ALG13	asparagine-linked glycosylation 13 homolog (s. cerevisiae)	79868	1	3			0.728536	1.00065	1.14605	0.823893	-1.37262
hSQ044490	PRPF39	prp39 pre-mrna processing factor 39 homolog (s. cerevisiae)	55015		3			0.756511	0.72887	1.07336	0.833276	-1.37199
hSQ002846	ZEB1	zinc finger e-box binding homeobox 1	6935	1	3			0.729173	0.72951	1.1097	0.925946	-1.37142
hSQ021585	ZDHHC23	zinc finger, dhhc-type containing 23	254887				7	0.794742	0.796866	0.910077	0.729445	-1.3709
hSQ015502	SLC25A32	transcribed locus::solute carrier family 25, member 32	81034	1				0.730396	0.773984	1.00282	0.792372	-1.36912
hSQ035196	ATAD2	atpase family, aaa domain containing 2	29028		3			0.80478	0.73086	1.06511	0.905006	-1.36825
hSQ003875	MST4	serine/threonine protein kinase mst4	51765	1	3			0.731472	0.745525	1.16055	1.00607	-1.36711
hSQ036548	HEXIM1	hexamethylene bis-acetamide inducible 1::transcribed locus	10614				7	0.821254	1.04235	1.1056	0.731536	-1.36699
hSQ021678	CDYL	chromodomain protein, y-like	9425	1	3			0.731823	0.799295	0.91938	0.859889	-1.36645
hSQ043162	KLF15	kruppel-like factor 15	28999	1				0.732865	0.890367	0.998123	0.804656	-1.36451
hSQ021708	OSBPL10	oxysterol binding protein-like 10	114884				7	0.784312	0.816675	0.867038	0.732974	-1.36431
hSQ006551	ZFAND5	full-length cdna clone cs0df030yh04 of fetal brain of homo sapiens (human)::zinc finger, an1-type domain 5	7763	1	3			0.733567	0.73338	1.06216	0.874843	-1.36355
hSQ005948	STT3B	stt3, subunit of the oligosaccharyltransferase complex, homolog b (s. cerevisiae)	201595	1				0.733482	0.771016	0.971195	0.850569	-1.36336
hSQ014279	PRPS2	phosphoribosyl pyrophosphate synthetase 2	5634	1				0.733736	0.79664	1.02534	0.843231	-1.36289
hSQ023838	UBL3	ubiquitin-like 3	5412	1	3			0.734533	0.762821	1.05478	0.842978	-1.36141
hSQ020040	GYLTL1B	glycosyltransferase-like 1b	120071				7	0.818145	0.879344	0.854726	0.735131	-1.3603
hSQ011340	RNF11	ring finger protein 11	26994	1				0.735179	0.856491	0.831578	1.12923	-1.36021
hSQ000619	FOS	transcribed locus::fbj murine osteosarcoma viral oncogene homolog	2353	1				0.735179	1.03706	0.954378	0.785582	-1.36021
hSQ026007	PKD2	polycystic kidney disease 2 (autosomal dominant)	5311	1			7	0.735282	0.776608	0.858581	0.742725	-1.36002
hSQ019565	CNIH	cornichon homolog (drosophila)::transcribed locus	10175	1				0.737719	0.769726	0.937612	0.802225	-1.35553
hSQ000403	NBEA	neurobeachin	26960		3			0.815742	0.738584	1.02163	0.85698	-1.35394
hSQ025925	CEP120	centrosomal protein 120kda	153241	1				0.739191	0.829032	1.03829	0.878674	-1.35283
hSQ022111	NOL8	nucleolar protein 8	55035		3			0.803851	0.740207	0.968071	0.816203	-1.35097
hSQ029487	PPWD1	peptidylprolyl isomerase domain and wd repeat containing 1	23398	1				0.740656	0.811315	0.988141	0.896757	-1.35015
hSQ033721	ANK3	ankyrin 3, node of ranvier (ankyrin g)	288		3			1.01122	0.740754	1.02185	1.02834	-1.34998
hSQ000552	CRY1	cryptochrome 1 (photolyase-like)	1407	1	3			0.74179	0.747327	1.02013	0.890672	-1.34809
hSQ003132	SOCS5	suppressor of cytokine signaling 5	9655	1	3		7	0.756636	0.742335	1.01072	0.760193	-1.3471
hSQ024979	ANKRA2	ankyrin repeat, family a (rfxank-like), 2	57763	1				0.74259	0.801888	1.0737	0.882295	-1.34664
hSQ042927	LOC221710	hypothetical protein loc221710	221710	1				0.742608	0.922411	1.03593	0.884499	-1.34661
hSQ033596	C1ORF63	chromosome 1 open reading frame 63	57035	1	3			0.756721	0.742691	1.06052	0.830125	-1.34646
hSQ038147	HNRNPH1	heterogeneous nuclear ribonucleoprotein h1 (h)	3187	1	3			0.742776	0.768793	1.03002	0.82645	-1.3463
hSQ022750	PCNP	pest proteolytic signal containing nuclear protein	57092	1	3			0.742802	0.753345	1.0022	0.837445	-1.34625
hSQ044048	MICAL3	microtubule associated monoxygenase, calponin and lim domain containing 3	57553				7	1.0841	1.08597	1.06628	0.742985	-1.34592
hSQ035074	CMPK1	cytidine monophosphate (ump-cmp) kinase 1, cytosolic	51727		3			0.802089	0.743034	1.06266	1.03419	-1.34583
hSQ002471	ERI1	exoribonuclease 1	90459				7	0.882039	0.841134	0.957666	0.743159	-1.34561
hSQ002752	DONSON	downstream neighbor of son	29980	1	3			0.753058	0.743206	1.03515	0.839829	-1.34552
hSQ028073	SCAF8	sr-related ctd-associated factor 8	22828	1	3			0.749604	0.744095	0.880707	0.836585	-1.34391
hSQ011670	SLC7A9	solute carrier family 7 (glycoprotein-associated amino acid transporter light chain, bo,+ system), member 9::solute carrier family 7 (cationic amino acid transporter, y+ system), member 9	11136				7	0.807967	0.813019	0.901126	0.744364	-1.34343
hSQ031423	FBXO28	f-box protein 28	23219	1				0.744391	0.861473	0.961009	0.821747	-1.34338
hSQ008958	CASC5	cancer susceptibility candidate 5	57082		3		7	1.10101	0.74474	0.888781	1.01052	-1.34275
hSQ034356	CENPE	centromere protein e, 312kda	1062				7	0.974837	0.909723	1.08316	0.745011	-1.34226
hSQ027261	TOMM20	translocase of outer mitochondrial membrane 20 homolog (yeast)	9804	1	3			0.752536	0.74508	0.870376	0.777007	-1.34214
hSQ027597	PLEKHA1	pleckstrin homology domain containing, family a (phosphoinositide binding specific) member 1	59338		3			0.780074	0.745278	1.12527	0.899231	-1.34178
hSQ009899	SESN1	sestrin 1	27244		3		7	0.780877	0.757771	0.919231	0.745614	-1.34118
hSQ027923	VEZT	vezatin, adherens junctions transmembrane protein	55591		3			0.797208	0.745924	1.07525	0.816627	-1.34062
hSQ015950	GPSM1	g-protein signaling modulator 1	26086				7	0.948575	0.864038	0.897406	0.746131	-1.34025
hSQ008420	CUL4A	cullin 4a	8451		3			0.827329	0.747151	1.02302	0.913515	-1.33842
hSQ016980	TIPARP	tcdd-inducible poly(adp-ribose) polymerase	25976	1				0.747252	0.858714	0.972599	0.898079	-1.33824
hSQ026082	PTCH1	patched 1	5727		3			0.831526	0.747511	0.924248	0.808788	-1.33777
hSQ036754	TMEM64	transmembrane protein 64	169200	1	3			0.747615	0.758121	0.947261	0.819581	-1.33759
hSQ042473	MTF2	metal response element binding transcription factor 2	22823		3			0.779525	0.74777	1.00387	0.874381	-1.33731
hSQ037872	ANKIB1	ankyrin repeat and ibr domain containing 1	54467	1				0.748116	0.810893	1.01055	0.860591	-1.33669
hSQ035174	CCAR1	cell division cycle and apoptosis regulator 1	55749		3			0.850864	0.748461	1.05244	0.92616	-1.33607
hSQ035345	CA8	carbonic anhydrase viii	767				7	0.770886	0.7984	0.896966	0.749153	-1.33484
hSQ015549	NFYA	nuclear transcription factor y, alpha	4800	1				0.749586	0.784675	0.888945	0.791594	-1.33407
hSQ034907	PDHX	pyruvate dehydrogenase complex, component x	8050		3			0.81244	0.749769	0.96215	0.842063	-1.33374
hSQ034009	PRC1	rcc1 domain containing 1::protein regulator of cytokinesis 1	9055				7	0.883978	0.843817	1.03467	0.749874	-1.33356
hSQ029318	PDE12	phosphodiesterase 12	201626		3			0.840286	0.750089	0.963818	0.914359	-1.33318
hSQ000263	TCF12	transcription factor 12	6938		3			0.777479	0.750713	0.955798	0.906417	-1.33207
hSQ022428	DCK	deoxycytidine kinase	1633		3			0.763641	0.7508	0.960706	0.966718	-1.33191
hSQ000068	SOX4	sry (sex determining region y)-box 4	6659	1				0.751176	0.804517	0.951318	0.892908	-1.33125
hSQ019378	PDZRN3	pdz domain containing ring finger 3	23024	1	3			0.766611	0.751899	0.986737	0.859487	-1.32997
hSQ037183	UBQLN1	ubiquilin 1	29979	1				0.751965	0.780877	1.03529	1.02159	-1.32985
hSQ022638	UBE4A	ubiquitination factor e4a (ufd2 homolog, yeast)::ubiquitination factor e4a	9354	1				0.752189	0.829415	0.962928	0.864637	-1.32945
hSQ030680	E2F3	e2f transcription factor 3	1871		3			0.862376	0.752363	1.1338	0.873169	-1.32915
hSQ032508	B3GNT5	mcf.2 cell line derived transforming sequence-like 2::udp-glcnac:betagal beta-1,3-n-acetylglucosaminyltransferase 5	84002				7	0.834316	0.878633	0.95	0.75245	-1.32899
hSQ037789	FAM91A2	family with sequence similarity 91, member a2	57234	1				0.753189	0.911433	1.11941	0.998884	-1.32769
hSQ045085	SF3B1	splicing factor 3b, subunit 1, 155kda	23451		3			0.75357	0.763482	0.918549	0.826498	-1.32702
hSQ036276	G3BP1	gtpase activating protein (sh3 domain) binding protein 1	10146		3			1.01133	0.753678	1.01292	0.882683	-1.32683
hSQ032967	NET1	neuroepithelial cell transforming 1	10276		3		7	0.787144	0.7684	0.903741	0.753916	-1.32641
hSQ031273	PPP2CA	protein phosphatase 2 (formerly 2a), catalytic subunit, alpha isoform::protein phosphatase 2, catalytic subunit, alpha isozyme	5515	1				0.754242	0.828362	0.97041	0.892279	-1.32583
hSQ026140	SENP6	sumo1/sentrin specific peptidase 6	26054		3			0.806455	0.754364	1.04078	0.830278	-1.32562
hSQ038825	TMEM168	transcribed locus::transmembrane protein 168	64418		3			0.831294	0.754705	1.08381	0.860818	-1.32502
hSQ033061	GOPC	golgi-associated pdz and coiled-coil motif containing	57120		3			0.837818	0.754788	1.01908	0.865137	-1.32488
hSQ038355	OTUD6B	otu domain containing 6b	51633	1	3			0.759646	0.755376	1.12709	0.822849	-1.32384
hSQ027542	LMAN1	lectin, mannose-binding, 1	3998	1	3			0.75538	0.767639	0.878481	0.839247	-1.32384
hSQ036420	SRSF5	serine/arginine-rich splicing factor 5	6430				7	0.924129	0.956125	1.02072	0.75569	-1.32329
hSQ031950	CTNNB1	catenin (cadherin-associated protein), beta 1, 88kda	1499	1				0.755716	0.849734	0.972588	0.908073	-1.32325
hSQ021394	HECW2	hect, c2 and ww domain containing e3 ubiquitin protein ligase 2	57520				7	0.913388	1.07125	1.03519	0.75608	-1.32261
hSQ032156	SRRM1	serine/arginine repetitive matrix 1	10250		3			1.14116	0.756371	1.22674	1.01877	-1.3221
hSQ032291	PQLC3	pq loop repeat containing 3	130814	1				0.756896	0.810097	1.03037	0.820268	-1.32119
hSQ025645	LUC7L3	luc7-like 3 (s. cerevisiae)	51747		3			1.03551	0.757123	1.10276	0.875847	-1.32079
hSQ038025	ATG12	atg12 autophagy related 12 homolog (s. cerevisiae)	9140		3			0.820254	0.757258	0.942223	0.875702	-1.32055
hSQ009172	BTG1	b-cell translocation gene 1, anti-proliferative	694				7	0.808321	0.875391	0.933896	0.757333	-1.32042
hSQ025857	GTF2E1	general transcription factor iie, polypeptide 1, alpha 56kda	2960	1				0.757421	0.781653	0.898029	0.802089	-1.32027
hSQ035620	YWHAQ	tyrosine 3-monooxygenase/tryptophan 5-monooxygenase activation protein, theta polypeptide	10971	1				0.758051	0.784802	0.897199	0.849096	-1.31917
hSQ044258	C6ORF1	chromosome 6 open reading frame 1	221491				7	0.830261	0.931784	0.894426	0.758082	-1.31912
hSQ014029	FAM81A	family with sequence similarity 81, member a	145773				7	0.784714	0.837278	0.911591	0.758346	-1.31866
hSQ015981	ZNF608	zinc finger protein 608	57507				7	0.919933	0.909522	0.926909	0.758699	-1.31805
hSQ009571	TRIM13	tripartite motif containing 13	10206		3		7	0.758734	1.09378	0.862941	1.10164	-1.31798
hSQ014853	FGF9	fibroblast growth factor 9 (glia-activating factor)	2254	1				0.758756	0.865922	0.895881		-1.31795
hSQ015214	CHD6	hypothetical loc100505744::chromodomain helicase dna binding protein 6	84181		3			0.853831	0.759383	0.976663	1.00045	-1.31686
hSQ020751	TMTC4	transmembrane and tetratricopeptide repeat containing 4	84899		3			0.822236	0.759465	1.1018	0.806859	-1.31672
hSQ023901	KTN1	kinectin 1 (kinesin receptor)	3895		3			0.932817	0.759664	1.22547	0.842744	-1.31637
hSQ026998	VCPIP1	valosin containing protein (p97)/p47 complex interacting protein 1	80124		3			0.765514	0.759907	1.1618	0.924204	-1.31595
hSQ004534	ESCO1	establishment of cohesion 1 homolog 1 (s. cerevisiae)	114799		3			0.89252	0.759909	1.097	0.877882	-1.31595
hSQ023549	NAB1	ngfi-a binding protein 1 (egr1 binding protein 1)	4664	1				0.760753	0.834385	1.03534	0.897021	-1.31449
hSQ035988	PLDN	transcribed locus, strongly similar to xp_002804802.1 predicted: hypothetical protein loc100427368 [macaca mulatta]::pallidin homolog (mouse)	26258		3			0.814225	0.760929	1.11252	0.79618	-1.31418
hSQ003028	LOC286044	protein phosphatase 1, regulatory (inhibitor) subunit 3b::hypothetical protein loc286044	286044				7	0.957382	1.14294	0.982344	0.761157	-1.31379
hSQ024615	DENND4A	denn/madd domain containing 4a	10260	1				0.761486	1.12282	1.1681	0.865757	-1.31322
hSQ010457	NUS1P3	nuclear undecaprenyl pyrophosphate synthase 1 homolog (s. cerevisiae) pseudogene 3	11049	1	3			0.761945	0.767657	1.014	0.895557	-1.31243
hSQ020383	SLC23A1	solute carrier family 23 (nucleobase transporters), member 1	9963				7	0.876966	0.842672	0.879184	0.76235	-1.31173
hSQ014510	SWAP70	swap switching b-cell complex 70kda subunit	23075				7	0.774684	0.813191	0.946263	0.762457	-1.31155
hSQ039596	P4HA1	prolyl 4-hydroxylase, alpha polypeptide i	5033	1				0.762583	1.01024	1.00298	0.882703	-1.31133
hSQ029009	LYPLA1	lysophospholipase i::transcribed locus	10434	1				0.762636	0.771908	1.00521	0.852504	-1.31124
hSQ033769	ITGA6	integrin, alpha 6	3655	1				0.762789	0.798686	0.995505	0.90297	-1.31098
hSQ045083	ITPR1	inositol 1,4,5-triphosphate receptor, type 1::inositol 1,4,5-trisphosphate receptor, type 1	3708		3			0.878187	0.762865	1.0216	0.891002	-1.31085
hSQ004227	BUB3	budding uninhibited by benzimidazoles 3 homolog (yeast)	9184		3			0.770126	0.763041	0.949013	0.883009	-1.31054
hSQ007552	OSBPL5	oxysterol binding protein-like 5	114879				7	1.02785	0.819216	0.89692	0.763212	-1.31025
hSQ022665	PPAT	phosphoribosyl pyrophosphate amidotransferase	5471		3			0.801996	0.763262	1.01638	0.833931	-1.31017
hSQ021726	NPAT	nuclear protein, ataxia-telangiectasia locus	4863	1	3			0.763296	0.765282	0.940114	0.825591	-1.31011
hSQ032173	RALB	v-ral simian leukemia viral oncogene homolog b (ras related; gtp binding protein)	5899				7	0.792052	0.992175	0.980552	0.763306	-1.31009
hSQ004154	CCNL1	cyclin l1	57018	1	3			0.770883	0.763409	1.01017	0.783262	-1.30991
hSQ035014	CDR2	cerebellar degeneration-related protein 2, 62kda	1039		3			0.86075	0.763659	1.00164	0.858585	-1.30949
hSQ044729	C1ORF174	chromosome 1 open reading frame 174	339448	1				0.763673	0.818501	0.955352	0.840929	-1.30946
hSQ007280	ELMOD2	elmo/ced-12 domain containing 2	255520		3			0.792143	0.763906	1.01099	0.820268	-1.30906
hSQ029556	UBE2J1	ubiquitin-conjugating enzyme e2, j1 (ubc6 homolog, yeast)::ubiquitin-conjugating enzyme e2, j1, u	51465				7	0.882193	1.01916	1.04248	0.763923	-1.30903
hSQ032516	IGJ	immunoglobulin j polypeptide, linker protein for immunoglobulin alpha and mu polypeptides	3512				7	0.913515	0.871255	1.04042	0.764277	-1.30843
hSQ007412	TMF1	tata element modulatory factor 1	7110		3			0.791198	0.764571	1.03856	0.840969	-1.30792
hSQ040794	ING1	inhibitor of growth family, member 1	3621	1	3			1.03447	0.764635	0.955909	0.830909	-1.30781
hSQ032171	RALGPS1	ral gef with ph domain and sh3 binding motif 1	9649		3			0.829073	0.764832	0.948465	0.774834	-1.30748
hSQ017988	ATF2	activating transcription factor 2	1386	1	3			0.765054	0.769024	1.14658	0.871054	-1.3071
hSQ009538	SEC23IP	sec23 interacting protein	11196		3			1.06881	0.76516	1.10931	0.916369	-1.30692
hSQ041551	CDC73	cell division cycle 73, paf1/rna polymerase ii complex component, homolog (s. cerevisiae)	79577		3			0.784856	0.76516	0.981572	0.848802	-1.30692
hSQ012949	GNAQ	guanine nucleotide binding protein (g protein), q polypeptide	2776	1				0.765514	1.04766	1.05199	0.792693	-1.30631
hSQ012138	FAM108C1	family with sequence similarity 108, member c1	58489		3			0.818847	0.76631	0.957935	0.928302	-1.30495
hSQ004034	NNT	nicotinamide nucleotide transhydrogenase	23530		3			0.839634	0.76631	0.933437	0.880971	-1.30495
hSQ034598	GRAMD4	gram domain containing 4	23151				7	0.914941	0.838165	0.886001	0.766381	-1.30483
hSQ043079	SON	son dna binding protein	6651	1	3			1.10944	0.766487	1.07487	1.00022	-1.30465
hSQ022717	NAP1L1	nucleosome assembly protein 1-like 1	4673	1			7	0.793352	0.775339	0.910407	0.767036	-1.30372
hSQ044489	ZC3H7A	zinc finger ccch-type containing 7a	29066		3			0.809676	0.76775	0.989442	0.827533	-1.30251
hSQ011211	HIST1H2BD	histone cluster 1, h2bd	3017				7	0.790772	1.05808	0.889665	0.767905	-1.30224
hSQ033938	SH3BP5	hypothetical loc100505696::sh3-domain binding protein 5 (btk-associated)	9467				7	0.845553	0.850844	0.882703	0.768438	-1.30134
